# Supplementary material
Source: Springer Nature journal article supplement (https://www.springermedizin.de/resource/supplementary/12939_2012_339_MOESM3_ESM.pdf/9550938)

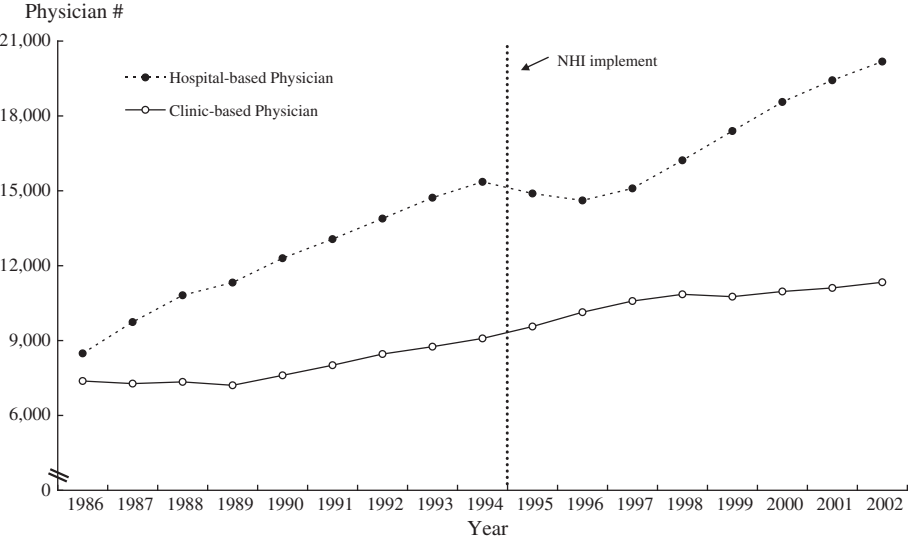

Supplement: MOESM3 [file 9550938]
